# Supplementary material
Source: publisher figshare collection journal article supplement (https://tandf.figshare.com/ndownloader/files/18233492)
Supplement: Supplementary file 1 [file 18233492]

**Supplementary Materials:**

**Between group comparisons:** Group comparisons were performed using Mann-Whitney analyses.

Independent variable 1: Gender

All group comparisons were statistically significant with a *p-*value < 0.001, except for hallucinations (*p* < 0.05).

|  | Male | | Female | |
| --- | --- | --- | --- | --- |
|  | Mean | SD | Mean | SD |
| Frequency of Childhood trauma | 2,14 | 2,59 | 3,84 | 3,08 |
| Avoidance | 6,29 | 6,89 | 15,01 | 9,10 |
| Intrusions | 8,00 | 7,93 | 14,05 | 9,63 |
| Shame | 47,68 | 14,07 | 62,66 | 17,36 |
| Hallucinations | 19,29 | 11,89 | 25,68 | 13,14 |

Independent variable 1: Presence of a self-report psychiatric diagnosis

All group comparisons were statistically significant with a *p-*value < 0.01.

|  | Diagnosis | | No Diagnosis | |
| --- | --- | --- | --- | --- |
|  | Mean | SD | Mean | SD |
| Frequency of Childhood trauma | 5,71 | 3,27 | 2,67 | 2,49 |
| Avoidance | 18,02 | 8,55 | 11,78 | 9,06 |
| Intrusions | 17,61 | 9,02 | 11,20 | 9,26 |
| Shame | 71,20 | 17,01 | 55,71 | 16,00 |
| Hallucinations | 29,88 | 13,73 | 22,49 | 12,29 |
|  |  |  |  |  |
